1  
2  
3  
4  
5  
6  
7  
8  
9  
10  
11  
12  
13  
14  
15  
16  
17  
18  
19  
20  
21  
22  
23  
24  
25  
26  
27  
28  
29  
30  
31  
32

# Roles of hostplant availability and quality for the distribution and climate change response of a dietary specialist herbivore

A. Nalleli Carvajal Acosta<sup>1\*</sup>, and Kailen Mooney<sup>1</sup>

<sup>1</sup> Department of Ecology and Evolutionary Biology, University of California-Irvine, Irvine, California, United States of America

\* Corresponding Author

E-mail: [ancarvaj@uci.edu](mailto:ancarvaj@uci.edu) (NC)

## 33 **Abstract**

34           Species distributions are recognized to be driven by abiotic factors, but the  
35 importance of biotic interactions that provide critical resources is less well understood,  
36 especially with respect to variation in critical resource quality. Disentangling the relative  
37 importance of these factors – abiotic environment, presence of critical resources and their  
38 quality– may be critical to predicting species response to climate change. We used species  
39 distribution models (SDMs) to address these questions for the western monarch butterfly  
40 (*Danaus plexippus*), a species that obligately feeds upon plants in the genus *Asclepias*, and  
41 for which hostplant quality in this region varies among species by an order of magnitude. We  
42 modeled the distribution of 24 *Asclepias* species to develop and compare three monarch  
43 distribution models with increasing levels of ecological complexity: (i) a null model using  
44 only environmental factors (a climate envelope model), (ii) a model using environmental  
45 factors and *Asclepias* spp. distribution, (iii) and a model using environmental factors and  
46 *Asclepias* spp. distribution weighted by hostplant quality assessed through a greenhouse  
47 bioassays of larval performance. *Asclepias* models predicted that half of the *Asclepias* spp.  
48 will both expand their ranges and shift their distribution towards higher latitudes while half  
49 will contract within the study region. Our performance analysis of monarch models revealed  
50 that the climate envelope model was the poorest performing. Adding hostplant distribution  
51 produced the best performing model, while accounting for hostplant quality did not improved  
52 model performance. The climate envelope model estimated more restrictive contemporary  
53 and future monarch ranges compared to both hostplants models. Although all three models  
54 predicted future monarch range expansions, the projected future distributions varied among  
55 models. The climate envelope model predicted range expansions along the Pacific coast and

56 contractions inland while hostplants models predicted range expansions in both of these  
57 regions and, as a result, estimated 14 and 19% increases in distribution relative to the climate  
58 envelope model, respectively. These results suggest that information on biotic interactions  
59 that provide critical resources is needed to predict future species distributions, but that  
60 variation in the quality of those critical resources may be of secondary importance.

61

62 **Keywords:** *Danaus plexippus*; monarch, species distribution models; MaxEnt; climate change;  
63 bioclimatic models; hostplant quality; Milkweeds; *Asclepias*; biotic interactions; specialized  
64 herbivores

## 65 **Introduction**

66 Climate change is expected to alter the distribution of most species (Parmesan et al. 1999,  
67 Crozier 2004, Bellard et al. 2012, Pauli et al. 2012) with many already experiencing range  
68 contractions or facing extinctions (Sekercioglu et al. 2008, La Sorte and Jetz 2010, Bellard et al.  
69 2012, Pauli et al. 2012). Understanding the underlying drivers is key to predicting such  
70 distributional response and also critical if we are to mitigate these impacts. Species distributions  
71 are presumed to be driven most strongly by abiotic factors, but biotic interactions can also play a  
72 key role (Guisan and Thuiller 2005). Because species often respond differently to abiotic stress  
73 (Schweiger et al. 2008, Van der Putten et al. 2010), producing accurate predictions necessitates  
74 that we also account for climate change effects on interacting species. This is especially true for  
75 species that engage in obligate interactions, as they depend on a few or even a single species to  
76 survive, and such species may not be available in all areas that are otherwise climatically  
77 suitable (Schweiger et al. 2008).

78           Herbivorous insects – the majority of multi-cellular species on earth (Lewinsohn et al.  
79 2005) – are highly host-specific; thus, their response to climate change will likely depend  
80 fundamentally on the responses of the plants upon which they are obligately dependent. Indeed,  
81 most herbivorous insects feed on a single or a few plant families (Bernays 1989, Forister et al.  
82 2015) with fewer than 10% feeding on plants belonging to more than three families (Price 1983).  
83 Furthermore, it has long been recognized that hostplants demonstrate considerable intra- and  
84 inter-specific variation in their resource quality to herbivores, and that resource quality is often  
85 heterogeneously distributed across landscapes (Denno and McClure 1983, Hunter et al. 1992).  
86 Intra- and inter-specific variation in host-quality can have large effects on herbivore performance  
87 (Singer et al. 2012) and may also play a significant role in determining the spatial distribution of  
88 host-specific herbivorous insects at local scales (Memmott et al. 1995, Mcmillin and Wagner  
89 1998, Egan and Ott 2007). However, the role of hostplant quality as a driver of species  
90 distribution at large spatial scales, and its implications for herbivore's distributional response to  
91 climate change, are largely unknown.

92           In this study we investigated the importance of hostplant distribution and quality as  
93 drivers of herbivore contemporary distribution and response to projected future climate change.  
94 We use Species Distribution Models (SDMs), statistical tools that combine observations of  
95 species occurrences with environmental covariates to estimate species distributions. These  
96 models identify the factors driving contemporary species ranges and can also infer species  
97 response to climate change based on projections for how those driving factors will change in the  
98 future (Elith and Leathwick 2009). SDMs have most often assumed that species distributions are  
99 defined by environmental factors alone. This so-called "climate envelope approach" are based on  
100 the Eltonian noise hypothesis, which posits that biotic interactions may be a major driver of

101 abundance at smaller spatial resolutions, but at larger and coarser spatial resolutions the effects  
102 of biotic interactions may average out, leaving abiotic factors as the principal drivers (Guisan  
103 and Thuiller 2005, Soberon and Nakamura 2009, Elith and Leathwick 2009). Yet recent  
104 modelling studies have identified biotic factors as important drivers of species distributions  
105 (Dilts et al. n.d., Araújo and Luoto 2007, Preston et al. 2008, Schweiger et al. 2008, de Araújo et  
106 al. 2014, Fraterrigo et al. 2014, Lemoine 2015, da Cunha et al. 2018) and SDMs predictions for  
107 species response to climate change have yielded contrasting results based upon whether or not  
108 biotic factors are included (Preston et al. 2008, Schweiger et al. 2008, Lemoine 2015).  
109 Accordingly, climate envelope modeling may accurately define the potential niche of a species,  
110 but the realized niche – defined in part by species interactions – may be substantially smaller.

111         Our aim in this study was to assess the importance of hostplant distribution and quality  
112 for driving contemporary and future distributions of dietary specialist herbivores. To do so, we  
113 studied the monarch butterfly (*Danaus plexippus*, Lepidoptera: Nymphalidae), the larvae of  
114 which feed exclusively from plants in the *Asclepias* genus which varies greatly among species in  
115 herbivore-defenses traits, nutrient content, and overall host quality (Agrawal and Fishbein 2006,  
116 Pocius et al. 2017). Monarchs are well known for their migratory and overwintering behavior  
117 (Pelton et al. 2019), and three previous studies have modelled their distribution. Lemoine  
118 (Lemoine 2015) accounted for hostplant distribution in the eastern monarch population response  
119 to climate change, predicting a poleward range expansion facilitated by *Asclepias* range  
120 expansions. Steven and Frey (Stevens and Frey 2010), and more recently Dilts *et al* (Dilts et al.  
121 n.d.), examined the role of hostplant availability and climate in determining the contemporary  
122 western monarch distribution and their breeding grounds, again demonstrating the importance of  
123 hostplants availability.

124           In the present study, we investigate the role of both hostplant distribution and quality in  
125 driving contemporary and future distributions of the western monarch population. To do so, we  
126 compared the performance of three species distribution models. In order of increasing  
127 complexity, these three models were: (i) a model using only climatic variables as predictors  
128 (hereafter, climate envelope model); (ii) a model using climatic variables and *Asclepias*  
129 distribution as predictors (hereafter, hostplant-presence model); and (iii) a model that included  
130 climatic variables, hostplants distribution and hostplant quality, which varied 10-fold among  
131 species as assessed through bioassays of larval performance (hereafter, hostplant quality model).  
132 We compared model performances and identified the variables determining the distribution of  
133 the western monarch breeding ranges. These models were then used to project and estimate  
134 changes in their distribution. Our study adds to past studies of this species and represents the first  
135 to estimate the future breeding range of the western monarch population. More broadly, this  
136 study is, to our knowledge, the first to explicitly test for the importance of hostplant quality of an  
137 obligate resource in driving species contemporary and future distribution.

## 138 **Materials and methods**

### 139 *Study System*

140           Monarch butterflies occur world-wide and, in their larval stage, feed exclusively from  
141 plants in the milkweed family (*Asclepias*, Apocynaceae: Asclepiadaceae). In North America,  
142 there are two migratory populations that breed east and west of the Rocky Mountains, with each  
143 of these regions being populated by multiple and largely unique sets of hostplant species (Ladner  
144 and Altizer 2005). Despite its dramatic population decline (Pelton et al. 2019), the western  
145 monarch population has been considerably understudied in comparison to the largest eastern  
146 population and we know little about how this population will be affected by climate change.

147 Western monarchs breed west of the Rocky Mountains and overwinter along the Pacific  
148 coast from Bodega Bay in northern California and as far south as Ensenada, Baja California,  
149 Mexico (Stevens and Frey 2010). During the spring, monarchs leave their overwintering sites  
150 and disperse throughout the western U.S. where they breed continuously during the summer. In  
151 the fall, adult monarchs return to their overwintering grounds (Pelton et al. 2019). Within North  
152 America, monarchs have been recorded feeding on 27 different plant species in the genus  
153 *Asclepias* (Ladner and Altizer 2005); however, adult females may oviposit in any available  
154 *Asclepias* species. Thus, monarchs may utilize multiple *Asclepias* species throughout their  
155 migratory paths.

156 The genus *Asclepias*, commonly known as milkweeds, consists of over 140 different  
157 species of which 130 are endemic to North America (Agrawal and Konno 2009). Milkweeds  
158 vary in their herbivore defensive strategies, which variously include combinations of  
159 cardenolides, latex, and trichomes, among others traits (Agrawal and Fishbein 2006). Inter-  
160 specific variation in the quantity of plant defenses (Agrawal and Fishbein 2006) and nutrient  
161 content (Pocius et al. 2017) have been associated with monarch larval mass, developmental rate,  
162 and early instar survival (Zalucki et al. 2001). In this sense, the quality of the *Asclepias* species  
163 may be important in determining monarch distributions.

## 164 ***Data Collection***

165 ***Occurrence data:*** We retrieved monarch and milkweed records for the United States  
166 using R Studio (R Studio Team 2015) from multiple open source databases using the R  
167 packages SPOCC, Ecoengine, rbison (Chamberlain et al. 2014, Karthik 2014, Chamberlain  
168 2019) and by accessing species occurrences directly from GBIF and iNaturalist databases  
169 (“GBIF Occurrence Download” 2019, “Naturalist [online]. Website” 2019). For monarchs,

170 we only selected eggs and larval records because they provide a direct index for the location  
171 of the monarchs breeding grounds as opposed to adult records which may only indicate the  
172 migratory path. Additional monarch larval records were provided by the Monarch Larvae  
173 Monitor Program (MLMP) (Ries and Oberhauser 2015).

174         The occurrence data archived in open source databases originates mainly from citizen  
175 scientist sightings and some from herbarium records. As opposed to formal survey methods, this  
176 type of data has some limitations such as sampling biases, potential misidentification and  
177 coordinate inaccuracies, and lack species absence records. We controlled for these limitations  
178 whenever possible. For example, when permitted, we used filters that only retrieved records  
179 confirmed by experts and/or records classified as of research quality and spatial filtering to  
180 control for sampling biases.

181         To focus on the western monarch population, we selected Milkweeds and monarch larval  
182 records from states corresponding to this region: California, Nevada, Colorado, Washington,  
183 New Mexico, Arizona, Utah, Oregon, and Idaho. After removing duplicate records, incorrect (i.e.  
184 over oceans) or inaccurate coordinates ( $>1000$  meters uncertainty) and observations, the final  
185 databases included 7,941 Milkweed records for 51 species (Data S1), and 904 monarch larval  
186 records (Data S2). *A. fascicularis* and *A. speciosa* were the most common species with 22%  
187 (2,541) and 12% (1,404) of total Milkweed records, respectively.

188 ***Environmental data and climate projections:*** Contemporary environmental  
189 bioclimatic variables and projections for the year 2070 were downloaded in R from the  
190 WorldClim website (Fick and Hijmans 2017) at 30-sec (approximately 1-km<sup>2</sup>) grid cells, the  
191 finest spatial resolution available. The current bioclimatic variables represent averages of a  
192 50-year period from 1950 to 2000. Climate change projections for the year 2070 represent



193 averages of a 30-year period from 2061 to 2080 based on the Hadley Centre Global  
194 Environmental Model, version 2, Earth System (HadGEM2-ES) model. The HadGEM2-ES  
195 model is recommended for ecological modeling as it accounts for ecologically-meaningful  
196 processes such as dynamic vegetation cover (The HadGEM2 Development Team: G. M.  
197 Martin et al. 2011). These projections are based on Representative Concentration Pathway  
198 (RCP) 8.5. The RCP 8.5 represents the worst-case scenario for greenhouse gas (GHG)  
199 concentrations, assuming that GHG emissions will continue to increase after the 21<sup>st</sup> century  
200 in contrast to other scenarios that assume GHG will remain stable or will decline after the  
201 21<sup>st</sup> century (Collins et al. n.d.). While a comparison of different projections for future  
202 climate would provide a more nuanced prediction for the future distributions of milkweeds  
203 and monarchs, using this single scenario met our primary purpose of evaluating the  
204 importance of host plant information in predicting specialist herbivore distributions.

205       Environmental layers were cropped to include the states corresponding to range of the  
206 western monarch population. To reduce multicollinearity among variables, we removed highly  
207 correlated variables based on their Pearson correlation coefficients using a pairwise correlations  
208 approach following Dormann *et al.* (Dormann et al. 2013) but with a less restrictive threshold of  
209 0.85 as in Elith *et al.* (Elith et al. 2006). We first removed variables that were correlated with  
210 multiple variables and, when only two variables were correlated, we selected the variable that  
211 was less statistically derived. This process yielded 11 environmental predictors (Table 1).

## 212 ***Species distribution modeling***

213       Because species occurrences in these datasets are available in the form of presence-only  
214 records, we used the maximum entropy method (hereafter MaxEnt) (Phillips et al. 2006) to  
215 model the current and future distribution of *Asclepias* and monarch breeding ranges. The MaxEnt

216 algorithm is a presence-background modeling tool based on Bayesian and maximum likelihood  
217 statistics (Elith et al. 2011). To estimate the probability of distribution of a species, MaxEnt uses  
218 species presence records and a set of environmental predictors (e.g. precipitation, temperature)  
219 across a pre-defined landscape that is divided into grid cells. From this landscape, background  
220 points are randomly selected to represent the species environmental domain or background  
221 environment. MaxEnt estimates the relative probability of occurrence for each grid cell by  
222 maximizing the similarity between the environmental conditions of presence records and that of  
223 the background environment, while constraining the prediction to have the same mean as the  
224 presence records. The relative probabilities (raw output) are transformed to probability of  
225 occurrence using post-logistic transformation (logistic output). Here we report the logistic output  
226 which assigns a probability of presence between 0 and 1 to each grid cell, assuming that typical  
227 presence localities have a probability of presence of 0.5. See Elith *et al.* (Elith et al. 2011) for a  
228 comprehensive statistical explanation of MaxEnt.

229 Data collection, data processing, and modeling were performed in R studio (R Studio  
230 Team 2015). Species distribution modeling was executed in MaxEnt using the ‘dismo’ package  
231 (Hijmans et al. 2011).

232 ***Asclepias models:*** We developed models for individual *Asclepias* species and estimated  
233 their distributions within an area restricted to the study region; therefore, our *Asclepias*  
234 ranges do not represent their full distributions but only represent hostplant availability for the  
235 western monarch. *Asclepias* species were modelled separately because their distributions  
236 may be delimited by distinct environmental factors. We discarded records identified at the  
237 genus level and species with fewer than 40 records as this limited number of observations  
238 would not allow for an accurate estimation of their distributions. To correct for potential

239 sampling biases, we used a spatial filtering approach which consists on randomly selecting  
240 one record per grid cell of a specified size (Kramer-Schadt et al. 2013). Spatial filtering was  
241 performed individually for each *Asclepias* species. This allowed us to retain records for  
242 multiple species co-occurring within a single grid cell as well as selecting the optimal spatial  
243 resolution that maximizes sample size while correcting for sampling biases. For example,  
244 species with a limited distribution (e.g. high-elevation species), were filtered at a finer spatial  
245 resolution of 1 km<sup>2</sup> and more widely distributed *Asclepias* species were filtered at a 30-km<sup>2</sup>  
246 resolution. An additional two *Asclepias* species, *A. viridiflora* and *A. curassavica*, were  
247 discarded because their records were clearly subject to sample biases and spatial thinning  
248 decreased their number of records to less than 40. The process of removing incorrect records  
249 and rare species, and spatial filtering, resulted in 24 *Asclepias* species databases each with a  
250 minimum of 40 records, totaling 3,549 *Asclepias* records (Table 2).

251       Spatially filtered data were randomly split into training and test data by withholding 25%  
252 of the occurrences and the remaining 75% was used for model training. To select background  
253 points, we first determined the *Asclepias* environmental domain, corresponding to an area of 50  
254 km<sup>2</sup> surrounding *Asclepias* occurrences. The environmental domain was then divided into 1 km<sup>2</sup>  
255 grid cells, and background points were randomly selected from within the monarch  
256 environmental domain in a checkerboard fashion. Individual *Asclepias* species were modeled  
257 using background points from the environmental domain represented by all *Asclepias* species.  
258 This process yielded 9000 background points to model *Asclepias* species. The best-fitted models  
259 for *Asclepias* with the highest AUC score were used to estimate their current and projected  
260 distribution under climate change.

261 **Monarch models:** The monarch distribution was modeled using a similar approach to  
262 *Asclepias*. As described above, we used spatial filtering to correct for sampling biases. Monarch  
263 larval records were first filtered at a range of resolutions (1 to 55 km<sup>2</sup>) and the spatial resolution  
264 yielding the highest AUC was then selected. The final dataset used to model monarch breeding  
265 range was thinned using 30 km<sup>2</sup> grid cells (the best-fitted model) and included 110 observations.  
266 As with *Asclepias*, we withhold 25% of the data for model testing and the remaining 75% was  
267 used for model training. To determine monarch larvae environmental domain, we selected  
268 4,000 background points following the same procedure described in the *Asclepias* modeling  
269 section, although the number of background points was lower due to the more restricted  
270 distribution of monarchs.

271 To test for the importance of hostplant availability, we first summarized the resulting  
272 individual *Asclepias* distribution layers into a single predictor layer representing overall  
273 *Asclepias* distribution under current and projected environmental conditions (Fig 1, A and B).  
274 The values assigned to grid cell in the genus-level hostplant distribution layer were determined  
275 by:

$$276 \quad P(Asc) = p(Asc1) + p(Asc2) + \dots p(Asc24)$$

277 Where ‘P’ represents the summarized genus-level probability and ‘p’ probability of  
278 distribution of individual *Asclepias* species numbered from 1 to 24. Because the ranges of many  
279 *Asclepias* species overlapped, forming the *Asclepias* distribution layer by summing probabilities  
280 captures not only the mean probability of distribution but also reflects species richness. We  
281 choose this approach under the assumption that higher species richness is associated with  
282 increased milkweed abundance and thus higher habitat quality for monarchs. Although a direct  
283 assessment of milkweed abundance would be preferable, no such data is readily available. This

284 process is mathematically equivalent to averaging species probabilities and then multiplying by  
285 species richness.

286 To assess hostplant quality, we used the average monarch larval weight supported by  
287 each *Asclepias* species grown under greenhouse conditions (Table 2). These protocols are  
288 described in detail by Petschenka and Agrawal (Petschenka and Agrawal 2015). Briefly,  
289 *Asclepias* plants were grown from seed in a greenhouse and after a period of 4-7 weeks neonate  
290 monarch caterpillars were placed individually upon the leaves of potted plants and weighed after  
291 5 days. Assessing hostplant quality under controlled greenhouse conditions controls for  
292 extraneous factors such as natural predator, competition with other herbivores, induced plant  
293 defenses and environmental variation that are necessarily associated with a field bioassay.

294 We weighted each *Asclepias* species distribution layer according to its host quality. The  
295 Milkweed with the greatest larval weight (*A. sololana*) was given a value of 1, and all other  
296 species were assigned values as proportions of this value, with the lowest quality weight being  
297 0.078 (*A. asperula*) (Table 2). Five species with no information on larval weight were weighted  
298 by the average host quality weight of 0.55. Weighted layers were then summarized into a single  
299 predictive layer representing the hostplant probability of distribution and species richness  
300 weighted by hostplant quality (Fig 1, C and D). The values assigned to grid cells of the overall  
301 hostplant quality layer were calculated as follow:

$$302 \quad Pq(Asc) = [p(Asc1) * (q1)] + [p(Asc2) * (q2)] + \dots [p(Asc24) * (q24)]$$

303 Where 'Pq' represents the summarized genus-level probability of distribution weighted  
304 by hostplant quality, 'p' the probability of distribution of individual *Asclepias* species numbered  
305 from 1 to 24, and 'q' the host-quality weight estimated for each *Asclepias* species. This approach  
306 is parallel to that used for the *Asclepias* distribution layer (above), capturing the effects of both

307 the mean probability of distribution and species richness for all co-existing *Asclepias* species, but  
308 now weighting each species according to its relative hostplant quality.

309 Lastly, we used the summarized *Asclepias* layers as predictors to generate and compared  
310 three models: a null model (climate envelope model) using only environmental factors as  
311 predictors; a model using environmental factors and hostplant distribution represented by the  
312 summarized *Asclepias* distribution (hostplant-presence model); and a second model using  
313 environmental factors and *Asclepias* distribution weighted by host quality (hostplant-quality  
314 model).

315 To identify the variables contributing more to each model, in addition to the “Analysis of  
316 Variable Contribution” reported by MaxEnt, we performed a jackknife test of variable  
317 importance. In a jackknife test, models are re-run using a single variable in isolation to identify  
318 the variables that yield the highest model gain when used in isolation. This test also identifies  
319 those variables that, when removed, decrease the model gain the most by re-running the models  
320 excluding one variable at a time.

321 Since there is currently no consensus regarding a single most appropriate metric to  
322 evaluate SDMs performance (Peterson et al. 2008, 2011, Warren and Seifert 2011), we evaluated  
323 model performance based on several criteria. The area-under-the-curve (AUC) statistic provides  
324 an estimate for the accuracy of predictions, with 0 indicating no predictive accuracy and 1  
325 perfect predictive accuracy. An AUC score of 0.5 indicates that the model performs no better  
326 than random. We also estimated performance metrics based on the Akaike Information Criterion  
327 corrected for small sample sizes (AICc). The AICc metric have the advantage of balancing both,  
328 model goodness-of-fit and model complexity. Furthermore, compared to AUC and BIC  
329 (Bayesian-Information-Criterion) based methods, AICc evaluation methods have been shown to

330 favor models that more accurately estimate the relative importance of variables and habitat  
331 suitability, both in the training region and when models are extrapolated to a different time  
332 period (Warren and Seifert 2011). We calculated the AICc, delta AICc ( $\Delta$ AICc), and Akaike  
333 weights (wAICc) for each model using the ENMeval package (Muscarella et al. 2014). The  
334 model with the lowest AICc value is considered the best model out of various candidate of  
335 models. The  $\Delta$ AICc is the difference between the best AICc and other candidate models. The  
336 best candidate model has a  $\Delta$ AICc of 0 and models with  $\Delta$ AICc lower than 2 are generally  
337 considered to have substantial support and should not be discarded (Muscarella et al. 2014).  
338 Akaike weights (wAICc) represents the likelihood of a model given the data. The weights are  
339 normalized to sum 1 and are interpreted as probabilities (Burnham and Anderson 2004).

340 Finally, we estimated suitable breeding area for monarchs and for *Asclepias* distribution  
341 from polygons drawn around areas with grid cell values higher than 0.5 from the output logistic  
342 layers projected from the final models.

## 343 **Results**

### 344 *Asclepias* models and estimated distribution

345 All *Asclepias* final models had AUC scores higher than 0.8, except for *A. speciosa* model  
346 which yielded an AUC score of 0.74, indicating that these models are a good fit for the  
347 observations (Table 2). The current estimated distributional ranges (Appendix S1, left panels.)  
348 were consistent with *Asclepias* spp. distributions published by the Biota of North America  
349 Program (BONAP) (Kartesz 2015).

350 Overall, within the study area, half of the *Asclepias* species are projected to expand their  
351 ranges by a mean of 88% (i.e. nearly doubling their distributions) whereas the other half will  
352 contract their ranges by a mean of 42% (i.e. more than halving their distributions) (Table 2 and

353 Appendix S1). Of the 24 *Asclepias* species, 19 species are predicted to shift their distributions to  
354 higher latitudes (79%) both along the Pacific coast and inland, with 11 of these also expanding  
355 their distributions. Of the 4 species not shifting their distributions northward, 3 will contract their  
356 ranges.

### 357 ***Monarch models and estimated distribution***

358 The AUC scores did not differ considerably among the three models, but AUC values  
359 were slightly higher for the hostplant-presence model (0.803) compared to both the hostplant-  
360 quality (0.800) and climate envelope model (0.799). However, the AIC-based metrics preferred  
361 the hostplant-presence model ( $\Delta\text{AICc}=0$ ,  $\text{wAICc}=1.00$ ) over the hostplant-quality  
362 ( $\Delta\text{AICc}=123.50$ ,  $\text{wAICc}=1.515^{-27}$ ) and climate envelope models ( $\Delta\text{AICc}=168.52$ ,  $\text{wAICc}=2.545^{-$   
363  $37$ ). The  $\Delta\text{AICc}$  for the competing climate envelope and hostplant quality model was much larger  
364 than 2 indicating that these two models had limited support. Likewise, the  $\text{wAICc}$  of the  
365 hostplant model was nearly 1 suggesting that the likelihood of this model being the best-fitted  
366 model was high (Table 3).

367 The environmental variables that contributed the most to the climate envelope model  
368 were the “minimum temperature of the coldest month” (43.4% contribution; (Fick and Hijmans  
369 2017) and “precipitation seasonality” (25.2% contribution, Fig. 3 A ; (Fick and Hijmans 2017)).  
370 For both hostplant-presence and hostplant quality models, the hostplants variable was the second  
371 most important factor for predicting the western monarch breeding range. The hostplants  
372 variable contributed most to the hostplant distribution model (22.5%), after the “minimum  
373 temperature of the coldest month” (33.1%) (Fig. 3 B and C). Although the hostplant quality  
374 model did not produce the best-fit model, weighting the hostplant layer by host-quality increased  
375 the contribution of the hostplant variable by 3% and decreased “minimum temperature of the



376 coldest month” variable contribution by 7% compared to the hostplant distribution model (Fig 3,  
377 B and C). Both hostplants layers (weighted by host-quality and unweighted) exhibited the  
378 highest gain (>0.40) in the jackknife test for variable importance in both hostplant models  
379 (Appendix S2). This indicates that hostplants provided the most useful information for predicting  
380 where monarch breeding grounds occur. For all three models the “average precipitation of the  
381 warmest quarter” (Fick and Hijmans 2017) decreased model gain the most when omitted  
382 suggesting that this environmental variable has the most information that is not present in other  
383 variables (Appendix S2).

384         The process of weighting the *Asclepias* distribution layer by quality did not dramatically  
385 altered the hostplant layer, and mainly rescaled the values of the layer (Fig 1, lower panels). This  
386 was probably due to large range overlaps among *Asclepias* species as it can be observed by  
387 overlaying the polygons corresponding to *Asclepias* suitable habitat (Appendix S3). Thus, a grid  
388 cell occupied by multiple *Asclepias* with variable host-quality may have the same value as a grid  
389 cell occupied by a few high-quality *Asclepias* species. The only area where weighting hostplants  
390 by quality appeared to change the grid cell values of the hostplant quality layer was the  
391 southwest region of Arizona and Utah which appeared to be occupied mostly by lower quality  
392 species, predominantly by *A. asperula*, our lowest quality hostplant (Fig 1, lower panels and  
393 Table 2).

394         The climate envelope model estimated more restricted ranges for the contemporary and  
395 future monarch distributions. Both hostplants models estimated nearly identical contemporary  
396 distributions for monarchs that were ~18% larger than the estimated by the climate envelope  
397 model (Fig 2, left panels and Table 2). Although all three models predicted future range  
398 expansions that nearly doubled their corresponding contemporary estimates, the hostplant-

399 presence and hostplant-quality models projected an increased in habitat suitability 14 and 19%  
400 larger than that of the climate envelope model, respectively (Fig 2, right panels and Table 2).  
401 This difference was primarily due to the fact that the climate envelope model predicted range  
402 contractions inland whereas both hostplants models predicted range expansions in this region.  
403 Finally, we detected some slight differences in the areas where hostplants models predicted that  
404 such range expansions will occur. For example, the hostplant quality model predicted a smaller  
405 range for monarchs in western New Mexico and a larger range in central Nevada, Utah and  
406 western Colorado. (Fig 2, right panels).

## 407 **Discussion**

408 Predicting herbivore response to climate change requires incorporating future hostplant  
409 availability, but hostplant quality may play a secondary role. While climate envelope projected a  
410 more restrictive current monarch distributions than hostplant models, model comparisons  
411 suggested that hostplant information provided superior predictive power. Furthermore, the three  
412 models differed in their future monarch projections under climate change with models including  
413 hostplant information predicting an increased in habitat suitability 14-19% larger than that of the  
414 climate envelope model. Despite the importance of hostplant information, models including  
415 hostplant quality did not prove superior to the model based on hostplant presence. Our study  
416 suggests that information on critical biotic interactions is essential to predict future species  
417 distributions under climate change.

418 The hostplant model was preferred by AIC-based metrics over a traditional climate  
419 envelope model and hostplant quality model. Hostplant availability, together with the minimum  
420 temperature of the coldest month, contributed over fifty percent to the hostplant model and over  
421 forty percent to the model gain when used in isolation. This suggests that the western monarch

422 breeding ranges are co-limited by both cold temperatures and hostplant availability. These  
423 findings are consistent with past work by Lemoine (Lemoine 2015) who found that models  
424 incorporating hostplants and environmental factors most accurately estimated the eastern  
425 monarch distribution. Additionally, our results are also supported by previous studies from  
426 Steven and Frey (Stevens and Frey 2010) and Dilts *et al.* (Dilts et al. n.d.) who identified  
427 *Asclepias* availability as well as climatic variables, including minimum temperature of the  
428 coldest month, as key for structuring the western monarch breeding grounds. These findings add  
429 to the increasing body of evidence suggesting that biotic interactions may govern species  
430 distributions as strongly as environmental conditions (Dilts et al. n.d., Araújo and Luoto 2007,  
431 Preston et al. 2008, Schweiger et al. 2008, de Araújo et al. 2014, Fraterrigo et al. 2014, Lemoine  
432 2015, da Cunha et al. 2018).

433 Hostplant quality varied ten-fold among Milkweed species but did not have a large effect  
434 on the overall estimates for the contemporary distribution of monarchs. We speculate this result  
435 may be due to the fact that our genus-level distribution layer also reflected species richness.  
436 *Asclepias* ranges exhibit substantial range overlaps in the American West (Appendix S3), thus,  
437 adult monarchs may preferentially oviposit on higher quality milkweeds in areas with mixed  
438 quality resources (Gripenberg et al. 2010), diminishing the influence of low-quality species.  
439 Hostplants model projected similar monarch distributions under a climate change scenario;  
440 however, their projections differed in some regions of the inland states of Utah, Nevada, New  
441 Mexico and Colorado. This implies that the importance of hostplant quality in determining  
442 herbivore distributions should not be discarded altogether as it may play a significant role in  
443 instances where herbivores rely on hostplant with less geographic overlap, and therefore, fewer  
444 food choices.

445           Our results demonstrate how climate envelope models that accurately represent current  
446 distributions may provide poor prediction for the future. This can occur when critical  
447 distributional drivers (e.g. hostplant distributions) correlate strongly with environmental factors  
448 under contemporary conditions (Wharton and Kriticos 2004) but not under climate change.  
449 These mechanistically-flawed models thus provide inaccurate predictions (Brewer and Gaston  
450 2003, Soberon and Nakamura 2009). In our study, the climate envelope model– although more  
451 restricted– estimated very similar monarch contemporary ranges than hostplant models (Fig 2,  
452 left panels) but differed in their future projections (Fig 2, right panels). Specifically, the two  
453 hostplant models predicted larger range expansions of monarchs than the climate envelope model  
454 inland. This suggests that the climate envelope model over predicted monarch climatic  
455 limitations due to contemporary correlations between climatic factors and milkweed  
456 distributions, but that this correlation may not persist in the future. Accordingly, models based  
457 solely on climatic factors may be adequate for estimating contemporary species distributions but  
458 nevertheless produce misleading projections under novel circumstances where abiotic conditions  
459 and biotic interactions do not respond in tandem to climate change.

460           The importance of incorporating the climatic response of hostplants into models is  
461 underscore by the fact that only models including hostplant information predicted range  
462 expansion inland while the climate-envelope model did not (Fig 2, right panels). The predicted  
463 inland range expansions of the western monarch breeding range appeared to be driven by higher  
464 hostplant availability in the regions of central Nevada, Utah and Colorado under future climatic  
465 conditions, which was identified by our models as one of the most important factors delimiting  
466 monarch distributions. Our results are congruent with previous findings by Lemoine (Lemoine

467 2015) whose study predicted northern range expansion of the eastern monarch population  
468 resulting from projected *Asclepias* range expansions under future climate change scenarios.

469 Lastly, it is worth noting that our model projections do not consider factors that were  
470 beyond the scope of our study but that may significantly impact monarch future distributions.  
471 For example, pesticide and land-use practices, specially overwintering habitat loss to housing  
472 development, is an existing threat to monarchs habitat (Pelton et al. 2019) that is likely to persist  
473 in the upcoming years. Furthermore, dams and human-facilitated invasions, may alter riparian  
474 areas potentially disrupting monarch migration patterns and monarch breeding grounds. Autumn  
475 migrants often follow riparian corridors (Dingle et al. 2005) and riparian vegetation has been  
476 associated with habitat suitability for some western Milkweed species (*A. subulata*, and *A.*  
477 *asperula*) (Dilts et al. n.d.).

## 478 **Conclusions**

479 In summary, this study shows that accounting for biotic interactions– and their  
480 distributional response to climate change– is required to predict the future distributions of  
481 species obligately dependent on such interactions. A climate-envelope approach may be effective  
482 for estimating contemporary species distributions but may produce misleading future projections  
483 as climate change may uncouple suitable climate from essential biotic interactions. Hostplant  
484 quality did not play a significant role in delimiting monarch distribution in the American West  
485 where *Asclepias* ranges overlapped substantially. However, there were slight differences in some  
486 regions suggesting that host-quality may still be important for predicting distributions of species  
487 dependent on a fewer number of resources. These results are relevant, not only for most  
488 herbivorous insects which are highly host-specific, but also for all organisms incurring in  
489 obligate biotic interactions (e.g. parasitic or mutualistic interactions). Ultimately, accurate

490 projections for the future will require better incorporating inter-specific dynamics into our  
491 models.

## 492 **Acknowledgements**

493 We thank Anurag Agrawal for providing hostplant quality data and Stijn Hantson,  
494 Colleen Neil, and Will Petry for their advice on the data collection and modeling phase of this  
495 project. We also thank the Monarch Larvae Monitoring Project (MLMP) for kindly providing  
496 monarch larval records.

497

498

499

500

501

502

503

504

505

506

507

## 508 **Literature Cited**

- 509 Agrawal, A. A., and M. Fishbein. 2006. Plant defense syndromes. *Ecology* 87:S132–S149.
- 510 Agrawal, A. A., and K. Konno. 2009. Latex: A model for understanding mechanisms, ecology,  
511 and evolution of plant defense against herbivory. *Annual Review of Ecology, Evolution,*  
512 *and Systematics* 40:311–331.
- 513 de Araújo, C. B., L. O. Marcondes-Machado, and G. C. Costa. 2014. The importance of biotic  
514 interactions in species distribution models: a test of the Eltonian noise hypothesis using  
515 parrots. *Journal of Biogeography* 41:513–523.
- 516 Araújo, M. B., and M. Luoto. 2007. The importance of biotic interactions for modelling species  
517 distributions under climate change. *Global Ecology and Biogeography* 16:743–753.
- 518 Bellard, C., C. Bertelsmeier, P. Leadley, W. Thuiller, and F. Courchamp. 2012. Impacts of  
519 climate change on the future of biodiversity: Biodiversity and climate change. *Ecology*  
520 *Letters* 15:365–377.
- 521 Bernays, E. A. 1989. Host range in phytophagous insects: the potential role of generalist  
522 predators. *Evolutionary Ecology* 3:299–311.
- 523 Brewer, A. M., and K. J. Gaston. 2003. The geographical range structure of the holly leaf-miner.  
524 II. Demographic rates. *Journal of Animal Ecology* 72:82–93.
- 525 Burnham, K. P., and D. R. Anderson. 2004. Multimodel inference: understanding AIC and BIC  
526 in model selection 33:261–304.
- 527 Chamberlain, S. 2019. rbison:Interface to the “USGS” “BISON” API.
- 528 Chamberlain, S., K. Ram, and T. Hart. 2014. spocc: R interface to many species occurrence data  
529 sources.

530 Collins, M., R. Knutti, J. Arblaster, J.-L. Dufresne, T. Fichefet, X. Gao, W. J. G. Jr, T. Johns, G.  
531 Krinner, M. Shongwe, A. J. Weaver, M. Wehner, M. R. Allen, T. Andrews, U. Beyerle,  
532 C. M. Bitz, S. Bony, B. B. Booth, H. E. Brooks, V. Brovkin, O. Browne, C. Brutel-  
533 Vuilmet, M. Cane, R. Chadwick, E. Cook, K. H. Cook, M. Eby, J. Fasullo, C. E. Forest,  
534 P. Forster, P. Good, H. Goosse, J. M. Gregory, G. C. Hegerl, P. J. Hezel, K. I. Hodges,  
535 M. M. Holland, M. Huber, M. Joshi, V. Kharin, Y. Kushnir, D. M. Lawrence, R. W. Lee,  
536 S. Liddicoat, C. Lucas, W. Lucht, J. Marotzke, F. Massonnet, H. D. Matthews, M.  
537 Meinshausen, C. Morice, A. Otto, C. M. Patricola, G. Philippon, S. Rahmstorf, W. J.  
538 Riley, O. Saenko, R. Seager, J. Sedláček, L. C. Shaffrey, D. Shindell, J. Sillmann, B.  
539 Stevens, P. A. Stott, R. Webb, G. Zappa, K. Zickfeld, S. Joussaume, A. Mokssit, K.  
540 Taylor, and S. Tett. (n.d.). Long-term climate change: projections, commitments and  
541 irreversibility:108.

542 Crozier, L. 2004. Warmer winters drive butterfly range expansion by increasing survivorship.  
543 Ecology 85:231–241.

544 da Cunha, H. F., É. D. Ferreira, G. Tessarolo, and J. C. Nabout. 2018. Host plant distributions  
545 and climate interact to affect the predicted geographic distribution of a Neotropical  
546 termite. *Biotropica* 50:625–632.

547 Denno, R. F., and M. S. McClurc. 1983. Variable plants and herbivores in natural and managed  
548 systems. Academic Press, New York.

549 Dilts, T. E., M. O. Steele, J. E. Engler, E. M. Pelton, S. J. Jepsen, S. J. McKnight, A. R. Taylor,  
550 C. A. Fallon, S. H. Black, E. E. Cruz, D. R. Cravier, and M. L. Forister. (n.d.). Host  
551 plants and climate structure habitat associations of the western monarch butterfly.



- 552 Dingle, H., M. P. Zalucki, W. A. Rochester, and T. Armijo-Prewitt. 2005. Distribution of the  
553 monarch butterfly, *Danaus plexippus* (L.) (Lepidoptera: Nymphalidae), in western North  
554 America: Monarch Butterflies in Western North America. *Biological Journal of the*  
555 *Linnean Society* 85:491–500.
- 556 Dormann, C. F., J. Elith, S. Bacher, C. Buchmann, G. Carl, G. Carré, J. R. G. Marquéz, B.  
557 Gruber, B. Lafourcade, P. J. Leitão, T. Münkemüller, C. McClean, P. E. Osborne, B.  
558 Reineking, B. Schröder, A. K. Skidmore, D. Zurell, and S. Lautenbach. 2013.  
559 Collinearity: a review of methods to deal with it and a simulation study evaluating their  
560 performance. *Ecography* 36:27–46.
- 561 Egan, S. P., and J. R. Ott. 2007. Host plant quality and local adaptation determine the distribution  
562 of gall-forming herbivore. *Ecology* 88:2868–2879.
- 563 Elith, J., C. H. Graham, R. P. Anderson, M. Dudík, S. Ferrier, A. Guisan, R. J. Hijmans, F.  
564 Huettmann, J. R. Leathwick, A. Lehmann, J. Li, L. G. Lohmann, B. A. Loiselle, G.  
565 Manion, C. Moritz, M. Nakamura, Y. Nakazawa, J. McC. M. Overton, A. Townsend  
566 Peterson, S. J. Phillips, K. Richardson, R. Scachetti-Pereira, R. E. Schapire, J. Soberón,  
567 S. Williams, M. S. Wisz, and N. E. Zimmermann. 2006. Novel methods improve  
568 prediction of species' distributions from occurrence data. *Ecography* 29:129–151.
- 569 Elith, J., and J. R. Leathwick. 2009. Species Distribution Models: Ecological Explanation and  
570 Prediction Across Space and Time. *Annual Review of Ecology, Evolution, and*  
571 *Systematics* 40:677–697.
- 572 Elith, J., S. J. Phillips, T. Hastie, M. Dudík, Y. E. Chee, and C. J. Yates. 2011. A statistical  
573 explanation of MaxEnt for ecologists: Statistical explanation of MaxEnt. *Diversity and*  
574 *Distributions* 17:43–57.

- 575 Fick, E. C., and R. J. Hijmans. 2017. WorldClim-Global Climate Data.  
576 <http://www.worldclim.org>.
- 577 Forister, M. L., V. Novotny, A. K. Panorska, L. Baje, Y. Basset, P. T. Butterill, L. Cizek, P. D.  
578 Coley, F. Dem, I. R. Diniz, P. Drozd, M. Fox, A. E. Glassmire, R. Hazen, J. Hrcek, J. P.  
579 Jahner, O. Kaman, T. J. Kozubowski, T. A. Kursar, O. T. Lewis, J. Lill, R. J. Marquis, S.  
580 E. Miller, H. C. Morais, M. Murakami, H. Nickel, N. A. Pardikes, R. E. Ricklefs, M. S.  
581 Singer, A. M. Smilanich, J. O. Stireman, S. Villamarín-Cortez, S. Vodka, M. Volf, D. L.  
582 Wagner, T. Walla, G. D. Weiblen, and L. A. Dyer. 2015. The global distribution of diet  
583 breadth in insect herbivores. *Proceedings of the National Academy of Sciences* 112:442–  
584 447.
- 585 Fraterrigo, J. M., S. Wagner, and R. J. Warren. 2014. Local-scale biotic interactions embedded in  
586 macroscale climate drivers suggest Eltonian noise hypothesis distribution patterns for an  
587 invasive grass. *Ecology Letters* 17:1447–1454.
- 588 GBIF.org. 2019. <https://doi.org/10.15468/dl.sjg2d2>.
- 589 Gripenberg, S., P. J. Mayhew, M. Parnell, and T. Roslin. 2010. A meta-analysis of preference-  
590 performance relationships in phytophagous insects. *Ecology Letters* 13:383–393.
- 591 Guisan, A., and W. Thuiller. 2005. Predicting species distribution: offering more than simple  
592 habitat models. *Ecology Letters* 8:993–1009.
- 593 Hijmans, R. J., S. Phillips, J. R. Leathwick, and J. Elith. 2011. Package ‘dismo.’
- 594 Hunter, M. D., T. Ohgushi, and P. W. Price. 1992. Effects of resource distribution on animal-  
595 plant interactions. Academic Press, San Diego, CA.
- 596 Kartesz, J. T. 2015. Floristic Synthesis of North America. Taxonomic Data Center, Chapel Hill,  
597 N.C. [maps generated from Kartesz, J.T. 2015.

- 598 Karthik, R. 2014. ecoengine: Programmatic interface to the API serving UC Berkeley's Natural  
599 History Data.
- 600 Kramer-Schadt, S., J. Niedballa, J. D. Pilgrim, B. Schröder, J. Lindenborn, V. Reinfelder, M.  
601 Stillfried, I. Heckmann, A. K. Scharf, D. M. Augeri, S. M. Cheyne, A. J. Hearn, J. Ross,  
602 D. W. Macdonald, J. Mathai, J. Eaton, A. J. Marshall, G. Semiadi, R. Rustam, H.  
603 Bernard, R. Alfred, H. Samejima, J. W. Duckworth, C. Breitenmoser-Wuersten, J. L.  
604 Belant, H. Hofer, and A. Wilting. 2013. The importance of correcting for sampling bias  
605 in MaxEnt species distribution models. *Diversity and Distributions* 19:1366–1379.
- 606 La Sorte, F. A., and W. Jetz. 2010. Projected range contractions of montane biodiversity under  
607 global warming. *Proceedings of the Royal Society B: Biological Sciences* 277:3401–  
608 3410.
- 609 Ladner, D. T., and S. Altizer. 2005. Oviposition preference and larval performance of North  
610 American monarch butterflies on four *Asclepias* species. *Entomologia Experimentalis et*  
611 *Applicata* 116:9–20.
- 612 Lemoine, N. P. 2015. Climate change may alter breeding ground distributions of eastern  
613 migratory Monarchs (*Danaus plexippus*) via range expansion of *Asclepias* host plants.  
614 *PLOS ONE* 10:e0118614.
- 615 Lewinsohn, T., V. Novotny, and Y. Basset. 2005. Insects on plants: diversity of herbivore  
616 assemblages revisited 36:597–620.
- 617 Mcmillin, Joel. D., and M. R. Wagner. 1998. Influence of host plant vs. natural enemies on the  
618 spatial distribution of a pine sawfly, *Neodiprion autumnalis*. *Ecological Entomology*  
619 23:397–408.

- 620 Memmott, J., R. K. Day, and H. C. J. Godfray. 1995. Intraspecific variation in host plant quality:  
621 the aphid *Cinara cupressi* on the Mexican cypress, *Cupressus lusitanica*. *Ecological*  
622 *Entomology* 20:153–158.
- 623 Muscarella, R., P. J. Galante, M. Soley-Guardia, R. A. Boria, J. M. Kass, M. Uriarte, and R. P.  
624 Anderson. 2014. ENMeval: An R package for conducting spatially independent  
625 evaluations and estimating optimal model complexity for MAXENT ecological niche  
626 models. *Methods in Ecology and Evolution* 5:1198–1205.
- 627 Naturalist [online]. Website. 2019, January. . <https://www.inaturalist.org>.
- 628 Parmesan, C., N. Ryrholm, C. Stefanescu, J. K. Hill, C. D. Thomas, H. Descimon, B. Huntley, L.  
629 Kaila, J. Kullberg, T. Tammaru, W. J. Tennent, J. A. Thomas, and M. Warren. 1999.  
630 Poleward shifts in geographical ranges of butterfly species associated with regional  
631 warming. *Nature* 399:579–583.
- 632 Pauli, H., M. Gottfried, S. Dullinger, O. Abdaladze, M. Akhalkatsi, J. L. B. Alonso, G. Coldea, J.  
633 Dick, B. Erschbamer, R. F. Calzado, D. Ghosn, J. I. Holten, R. Kanka, G. Kazakis, J.  
634 Kollar, P. Larsson, P. Moiseev, D. Moiseev, U. Molau, J. M. Mesa, L. Nagy, G. Pelino,  
635 M. Puscas, G. Rossi, A. Stanisci, A. O. Syverhuset, J.-P. Theurillat, M. Tomaselli, P.  
636 Unterluggauer, L. Villar, P. Vittoz, and G. Grabherr. 2012. Recent plant diversity  
637 changes on Europe’s mountain summits. *Science* 336:353–355.
- 638 Pelton, E. M., C. B. Schultz, S. J. Jepsen, S. H. Black, and E. E. Crone. 2019. Western Monarch  
639 population plummets: status, probable causes, and recommended conservation actions.  
640 *Frontiers in Ecology and Evolution* 7:258.

- 641 Peterson, A., J. Soberon, R. G. Pearson, R. P. Anderson, E. Martinez-Meyer, M. Nakamura, and  
642 M. Araújo. 2011. Ecological niches and geographic distributions. Princeton University,  
643 Press.
- 644 Peterson, A. T., M. Papeş, and J. Soberón. 2008. Rethinking receiver operating characteristic  
645 analysis applications in ecological niche modeling. *Ecological Modelling* 213:63–72.
- 646 Petschenka, G., and A. A. Agrawal. 2015. Milkweed butterfly resistance to plant toxins is linked  
647 to sequestration, not coping with a toxic diet. *Proceedings of the Royal Society B:  
648 Biological Sciences* 282:20151865.
- 649 Phillips, S. J., R. P. Anderson, and R. E. Schapire. 2006. Maximum entropy modeling of species  
650 geographic distributions. *Ecological Modelling* 190:231–259.
- 651 Pocius, V. M., D. M. Debinski, J. M. Pleasants, K. G. Bidne, R. L. Hellmich, and L. P. Brower.  
652 2017. Milkweed matters: Monarch butterfly (Lepidoptera: Nymphalidae) survival and  
653 development on nine midwestern Milkweed species. *Environmental Entomology*  
654 46:1098–1105.
- 655 Preston, K. L., J. T. Rotenberry, R. A. Redak, and M. F. Allen. 2008. Habitat shifts of  
656 endangered species under altered climate conditions: importance of biotic interactions.  
657 *Global Change Biology*.
- 658 Price, P. W. 1983. Hypotheses on organization and evolution in herbivorous insect communities.  
659 Pages 559–98 *Variable Plants and Herbivores in Natural and Managed Systems*.  
660 Academic Press, New York.
- 661 R Studio Team. 2015. R Studio. Integrated Development for R. RStudio, Inc., Boston, MA.
- 662 Ries, L., and K. S. Oberhauser. 2015. A citizen army for science: quantifying the contributions of  
663 citizen scientists to our understanding of monarch butterfly biology *65:419–430*.

- 664 Schweiger, O., J. Settele, O. Kudrna, S. Klotz, and I. Kühn. 2008. Climate change can cause  
665 spatial mismatch of trophically interacting species. *Ecology* 89:3472–3479.
- 666 Sekercioglu, C. H., S. H. Schneider, J. P. Fay, and S. R. Loarie. 2008. Climate change,  
667 elevational range shifts, and bird extinctions: *Elevation, Climate Change, and Bird*  
668 *Extinctions*. *Conservation Biology* 22:140–150.
- 669 Singer, M. S., T. E. Farkas, C. M. Skorik, and K. A. Mooney. 2012. Tritrophic interactions at a  
670 community level: effects of host plant species quality on bird predation of caterpillars  
671 179:363–374.
- 672 Soberon, J., and M. Nakamura. 2009. Niches and distributional areas: Concepts, methods, and  
673 assumptions. *Proceedings of the National Academy of Sciences* 106:19644–19650.
- 674 Stevens, S. R., and D. F. Frey. 2010. Host plant pattern and variation in climate predict the  
675 location of natal grounds for migratory monarch butterflies in western North America.  
676 *Journal of Insect Conservation* 14:731–744.
- 677 The HadGEM2 Development Team: G. M. Martin, N. Bellouin, W. J. Collins, I. D. Culverwell,  
678 P. R. Halloran, S. C. Hardiman, T. J. Hinton, C. D. Jones, R. E. McDonald, A. J.  
679 McLaren, F. M. O’Connor, M. J. Roberts, J. M. Rodriguez, S. Woodward, M.  
680 J. Best, M. E. Brooks, A. R. Brown, N. Butchart, C. Dearden, S. H. Derbyshire, I.  
681 Dharssi, M. Doutriaux-Boucher, J. M. Edwards, P. D. Falloon, N. Gedney, L. J. Gray, H.  
682 T. Hewitt, M. Hobson, M. R. Huddleston, J. Hughes, S. Ineson, W. J. Ingram, P. M.  
683 James, T. C. Johns, C. E. Johnson, A. Jones, C. P. Jones, M. M. Joshi, A. B. Keen, S.  
684 Liddicoat, A. P. Lock, A. V. Maidens, J. C. Manners, S. F. Milton, J. G. L. Rae, J. K.  
685 Ridley, A. Sellar, C. A. Senior, I. J. Totterdell, A. Verhoef, P. L. Vidale, and A.

686 Wiltshire. 2011. The HadGEM2 family of Met Office Unified Model climate  
687 configurations. *Geoscientific Model Development* 4:723–757.

688 Van der Putten, W. H., M. Macel, and M. E. Visser. 2010. Predicting species distribution and  
689 abundance responses to climate change: why it is essential to include biotic interactions  
690 across trophic levels. *Philosophical Transactions of the Royal Society B: Biological  
691 Sciences* 365:2025–2034.

692 Warren, D. L., and S. N. Seifert. 2011. Ecological niche modeling in Maxent: the importance of  
693 model complexity and the performance of model selection criteria. *Ecological  
694 Applications* 21:335–342.

695 Wharton, T. N., and D. J. Kriticos. 2004. Biodiversity: The fundamental and realized niche of the  
696 Monterey Pine aphid, *Essigella*. *Diversity and Distributions*:10.

697 Zalucki, M., L. Brower, and A. Alonso. 2001. Detrimental effects of latex and cardiac glycosides  
698 on survival and growth of first-instar monarch butterfly larvae *Danaus plexippus* feeding  
699 on the sandhill milkweed *Asclepias humistrata* 26:212–224.

700

701

702

703

704

705

706

707

708

709

710

711

712

713

714 **Tables**

715

716

**Table 1. Selected environmental variables**

| <b>Worldclim Code</b> | <b>Environmental Variable*</b>       |
|-----------------------|--------------------------------------|
| <b>Bio1</b>           | Annual Mean Temperature              |
| <b>Bio5</b>           | Max Temperature of Warmest Month     |
| <b>Bio6</b>           | Minimum Temperature of Coldest Month |
| <b>Bio7</b>           | Temperature Annual Range             |
| <b>Bio8</b>           | Mean Temperature of Wettest Quarter  |
| <b>Bio9</b>           | Mean Temperature of Driest Quarter   |
| <b>Bio12</b>          | Annual Precipitation                 |
| <b>Bio15</b>          | Precipitation Seasonality            |
| <b>Bio17</b>          | Precipitation of Driest Quarter      |
| <b>Bio18</b>          | Precipitation of Warmest Quarter     |
| <b>Bio19</b>          | Precipitation of Coldest Quarter     |

\*Selected environmental variables with Pearson correlation coefficient of 0.85 or lower.

717

718

719

720

721

722

723

724

725

726

727

728

729

730

731

732



733 **Table 2. Milkweeds models summary and estimated habitat suitability**  
 734

| <i>Asclepias</i> species    | Spatial filtering (Km <sup>2</sup> ) | Records |          | AUC best model | Estimated Habitat (Km <sup>2</sup> ) |           | Host quality weight <sup>1</sup> |
|-----------------------------|--------------------------------------|---------|----------|----------------|--------------------------------------|-----------|----------------------------------|
|                             |                                      | Total   | Filtered |                | Current                              | Projected |                                  |
| <i>A. albicans</i>          | 1                                    | 434     | 209      | 0.977          | 37,937                               | 28,444    | <b>0.554</b>                     |
| <i>A. asperula</i> *        | 30                                   | 586     | 244      | 0.815          | 614,502                              | 678,420   | 0.078                            |
| <i>A. californica</i> *     | 1                                    | 607     | 277      | 0.945          | 84,794                               | 124,187   | 0.306                            |
| <i>A. cordifolia</i> *      | 30                                   | 683     | 173      | 0.848          | 230,690                              | 215,368   | 0.621                            |
| <i>A. cryptoceras</i>       | 30                                   | 210     | 128      | 0.839          | 416,872                              | 246,545   | 0.218                            |
| <i>A. engelmanniana</i> *   | 30                                   | 90      | 70       | 0.915          | 277,368                              | 230,811   | 0.502                            |
| <i>A. eriocarpa</i>         | 30                                   | 878     | 145      | 0.888          | 147,561                              | 235,229   | 0.541                            |
| <i>A. erosa</i> *           | 30                                   | 524     | 145      | 0.885          | 285,506                              | 466,099   | 0.671                            |
| <i>A. fascicularis</i> *    | 30                                   | 2259    | 399      | 0.859          | 306,140                              | 512,078   | 0.545                            |
| <i>A. halli</i>             | 1                                    | 48      | 48       | 0.915          | 197,755                              | 2,896     | 0.898                            |
| <i>A. incarnata</i> *       | 1                                    | 144     | 94       | 0.805          | 113,426                              | 64,869    | 0.823                            |
| <i>A. labriformis</i>       | 1                                    | 68      | 57       | 0.945          | 22,126                               | 4,863     | <b>0.554</b>                     |
| <i>A. latifolia</i> *       | 30                                   | 162     | 102      | 0.858          | 415,185                              | 412,476   | 0.394                            |
| <i>A. linaria</i> *         | 1                                    | 127     | 75       | 0.962          | 376,557                              | 382,289   | 0.427                            |
| <i>A. macrosperma</i>       | 1                                    | 71      | 62       | 0.965          | 624,888                              | 124,259   | <b>0.554</b>                     |
| <i>A. macrotis</i> *        | 1                                    | 46      | 44       | 0.925          | 196,251                              | 151,159   | <b>0.554</b>                     |
| <i>A. nycatginifolia</i> *  | 1                                    | 154     | 100      | 0.958          | 112,228                              | 233,621   | <b>0.554</b>                     |
| <i>A. pumila</i> *          | 1                                    | 89      | 73       | 0.985          | 69,502                               | 5,581     | 0.660                            |
| <i>A. soloanoana</i> *      | 1                                    | 132     | 68       | 0.995          | 17,704                               | 65,588    | 1.00                             |
| <i>A. speciosa</i>          | 30                                   | 1359    | 478      | 0.746          | 958,479                              | 937,320   | 0.768                            |
| <i>A. subulata</i> *        | 30                                   | 627     | 114      | 0.927          | 114,507                              | 379,000   | 0.606                            |
| <i>A. subverticillata</i> * | 30                                   | 545     | 286      | 0.809          | 594,885                              | 674,988   | 0.505                            |
| <i>A. tuberosa</i> *        | 30                                   | 184     | 88       | 0.831          | 305,144                              | 470,641   | 0.681                            |
| <i>A. vestita</i> *         | 1                                    | 159     | 70       | 0.983          | 34,449                               | 80,731    | 0.286                            |

735 \*Species marked with an asterisk are projected to shift their distribution to higher latitudes (S1  
 736 File.)

737 <sup>1</sup>Hostplant quality weight determined by the average weight of monarch larvae reared on 24  
 738 *Asclepias* species within a 5-day period. Bold numbers indicate the average weight assigned to  
 739 species with missing hostplant quality information.

740  
 741  
 742  
 743  
 744  
 745  
 746  
 747  
 748

749 **Table. 3 Monarch model performance comparison and estimated habitat suitability**

| Model              | $n^1$ | AUC   | AICc      | $\Delta$ AICc | wAICc                | Estimated habitat (km <sup>2</sup> ) * |                  |
|--------------------|-------|-------|-----------|---------------|----------------------|----------------------------------------|------------------|
|                    |       |       |           |               |                      | Current                                | Projected (2070) |
| Climate envelope   | 60    | 0.799 | 25,694.99 | 168.52        | 2.545 <sup>-37</sup> | 214,245                                | 409,091          |
| Hostplant-presence | 61    | 0.803 | 25,526.46 | 0.000         | 1.00                 | 252,464                                | 466,306          |
| Hostplant-quality  | 61    | 0.800 | 25,649.97 | 123.50        | 1.515 <sup>-27</sup> | 252,465                                | 486,200          |

750 \*Estimated habitat was calculated by summarizing areas with probability of distribution higher  
751 than 0.5 from the logistic output layers produced by each model. <sup>1</sup>  $n$  gives the number of  
752 parameters of each model.

753

754

755

756

757

758

759

760

761

762

763

764

765

766

767

768

769

770

771

772

773

774

775

776 **Figures**

777

778 **Figure 1. Contemporary and projected genus-level milkweeds distribution**

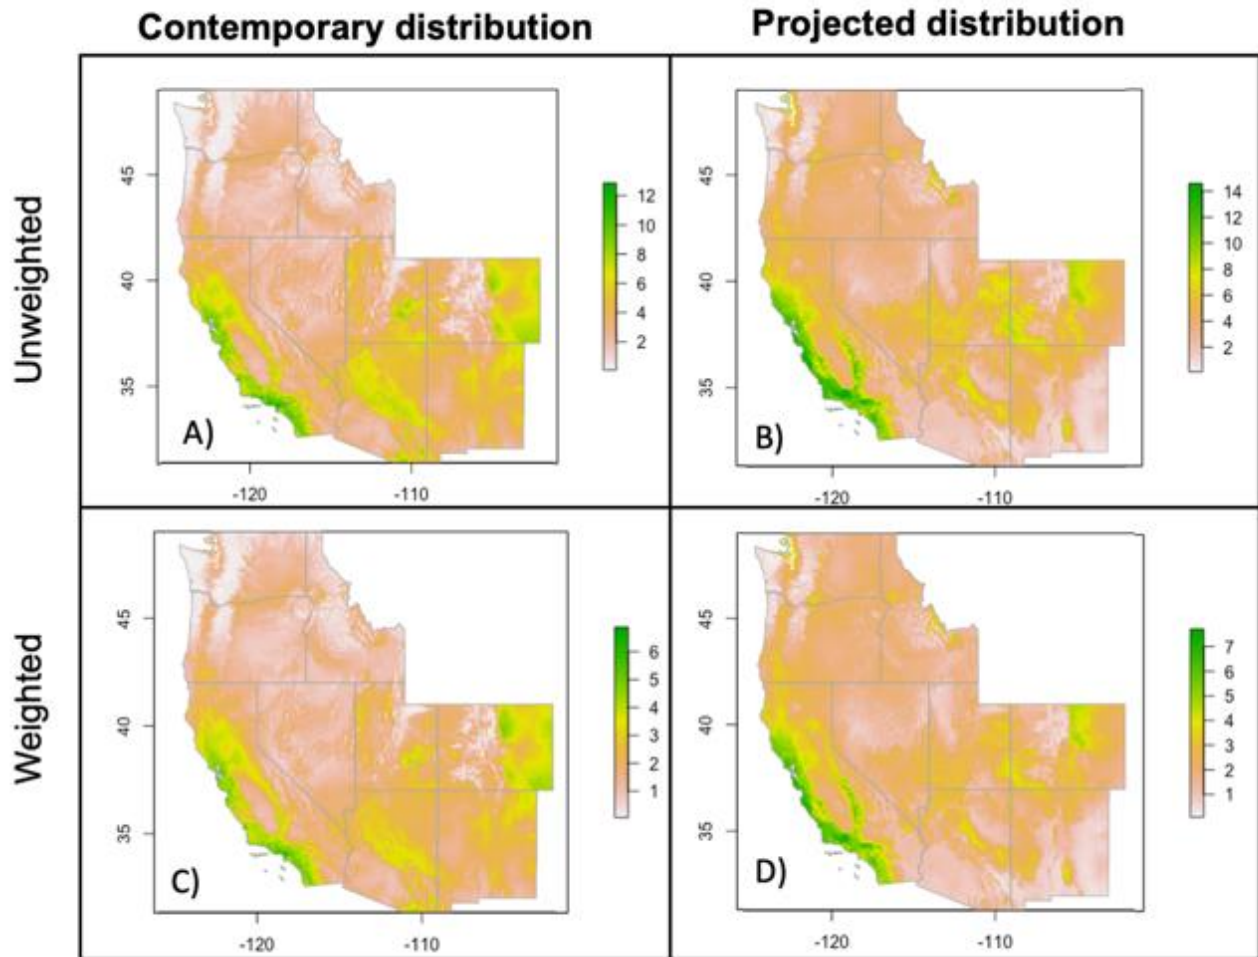

779

780 **Fig 1.** Genus-level *Asclepias* predictor and projection layers used in the monarch hostplant  
781 distribution and quality models. The unweighted layers reflect the summed probability of  
782 occurrence of all *Asclepias* species, thus reflecting mean probability of occurrence and species  
783 richness, while the weighted layer additionally weighs each species by hostplant quality. ‘Green’  
784 indicate high probability of distribution, species richness and/or host-quality, and ‘white’ low  
785 probability of distribution, species richness and/or low quality.

786

787

788

789

790 **Figure 2. Monarch contemporary and projected future breeding ranges**

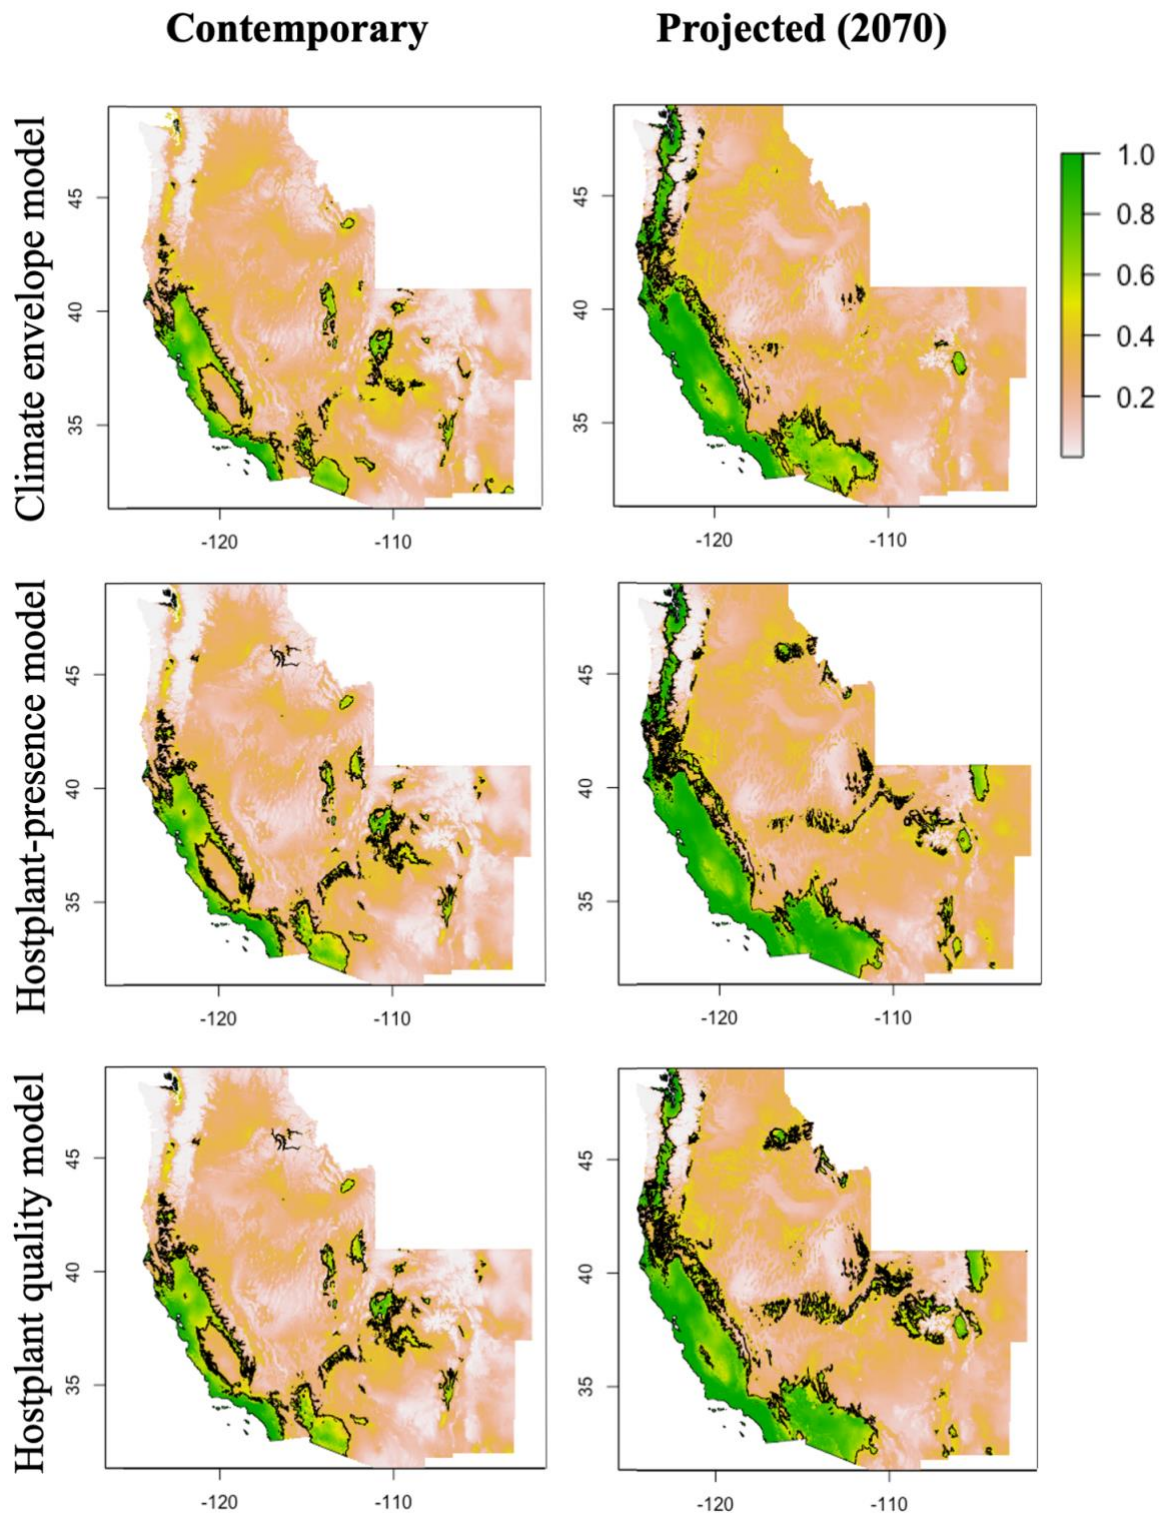

791  
792 **Fig 2.** Left panels (A, C, E) indicate the current probability of distribution of the monarch  
793 breeding grounds estimated by the three models, with 'light yellow' representing low probability  
794 and 'dark blue' high probability. Right panels (B, D, F) indicate the projected probability of

795 distribution of the monarch breeding grounds for the year 2070 estimated by the three models.  
796 Suitable habitat for monarch breeding is delineated in black and represent areas with a  
797 probability of distribution greater than 0.5.

798

799

800

801

802

803

804

805

806

807

808

809

810

811

812

813

814

815

816

817

818

819

820

821

822

823

824

825

826 **Figure 3. Analysis of variable importance**

827

828

829

830

831

832

833

834

835

836

837

838

839

840

841

842

843

844

845

846

847

848

849

850

851

852

853

854

855

856

857

858

859

860

861

862

863

864

865

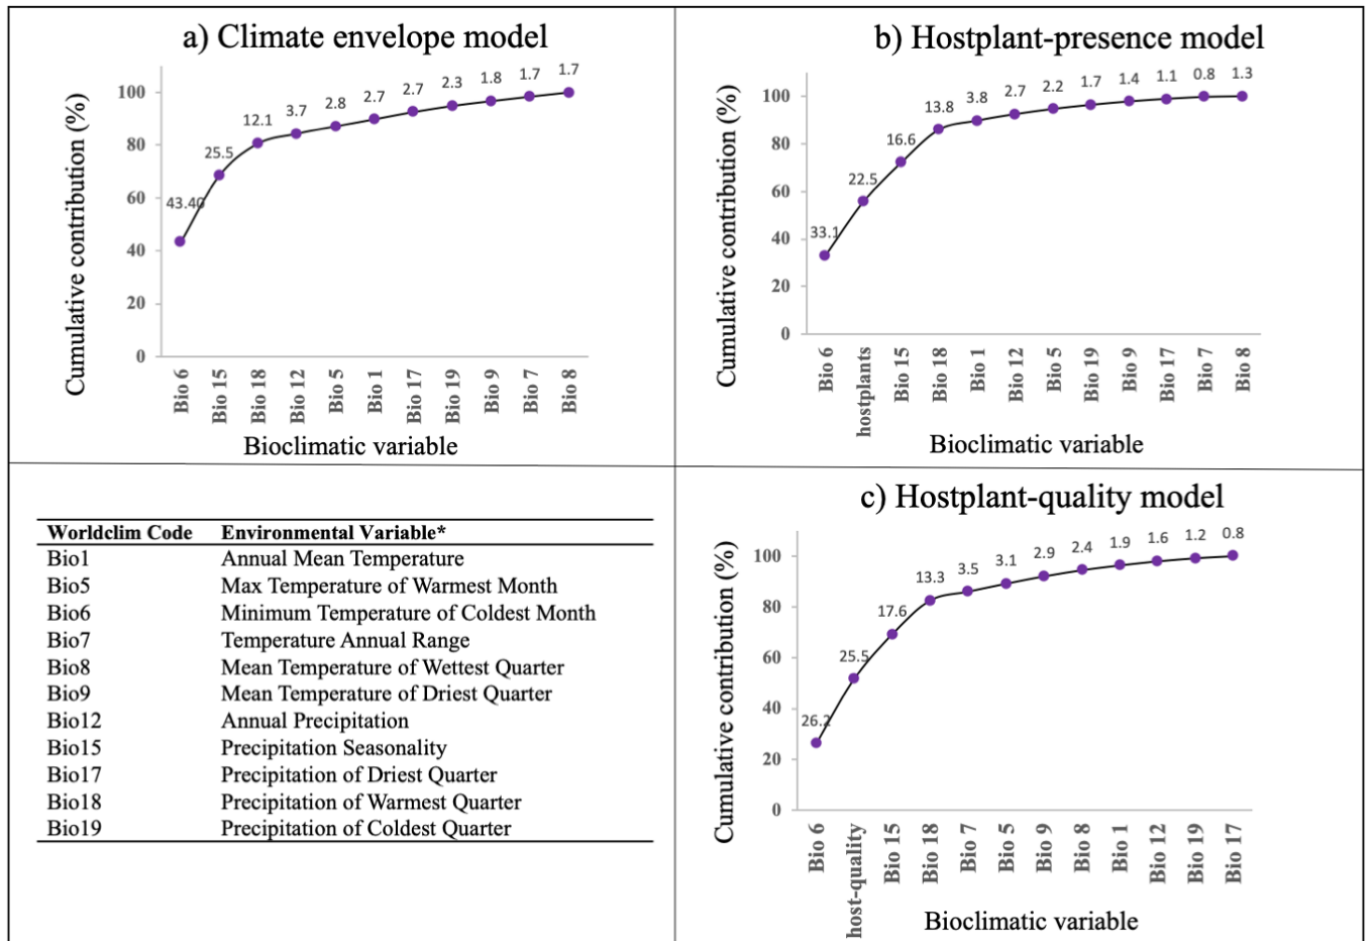

**Fig. 3.** Percent contribution that each variable contributes to the models in decreasing order from left to right.

## 866 **Appendices**

867

868 **Appendix S1. Milkweeds species contemporary and projected distributions.** Estimated  
869 contemporary distribution of 24 species of *Asclepias* (left panels) and projections under a climate  
870 change scenario for 2070 (right panels), with ‘green’ indicating high probability of distribution  
871 and ‘white’ low probability. Suitable habitat for each *Asclepias* spp. is delineated in black and  
872 represent areas with a probability of distribution greater than 0.5.

873 **Appendix S2. Jackknife Test of Variable Importance.** Jackknife test of variable importance.  
874 Blue bars indicate model gain when each variable is used in isolation, turquoise bars represent  
875 model gain when a single variable is excluded, and red bars represent model gain when all  
876 variables are included.

877 **Appendix S3. Milkweeds range overlaps in the Western United States.** Each overlaid layer  
878 represents the range of individual *Asclepias* species estimated by drawing a polygon around  
879 areas with areas with a probability of distribution greater than 0.5. Regions in white represent  
880 areas with no Milkweeds, ‘light green’ represent low range overlap, and ‘dark green’ high range  
881 overlap.

882 **Metadata S1.** R code for monarch and milkweed species distributions modeling.

883 **Data S1. Milkweed species records** retrieved from various open source databases within the  
884 study region.

885 **Data S2. Monarch larval records** retrieved from open source databases and the MLMP  
886 (Monarch Larvae Monitoring Project) within the study region.

887

888

889

890

891

892

893

894

895

896

897

898

899

900

901

902

903

904

905

906

907

908

909

910
